# Supplementary material
Source: Springer Nature journal article supplement (http://www.nature.com/msb/journal/v1/n1/extref/msb4100004-s3.pdf)
Supplement: msb4100004-s3.pdf [file msb4100004-s3.pdf]

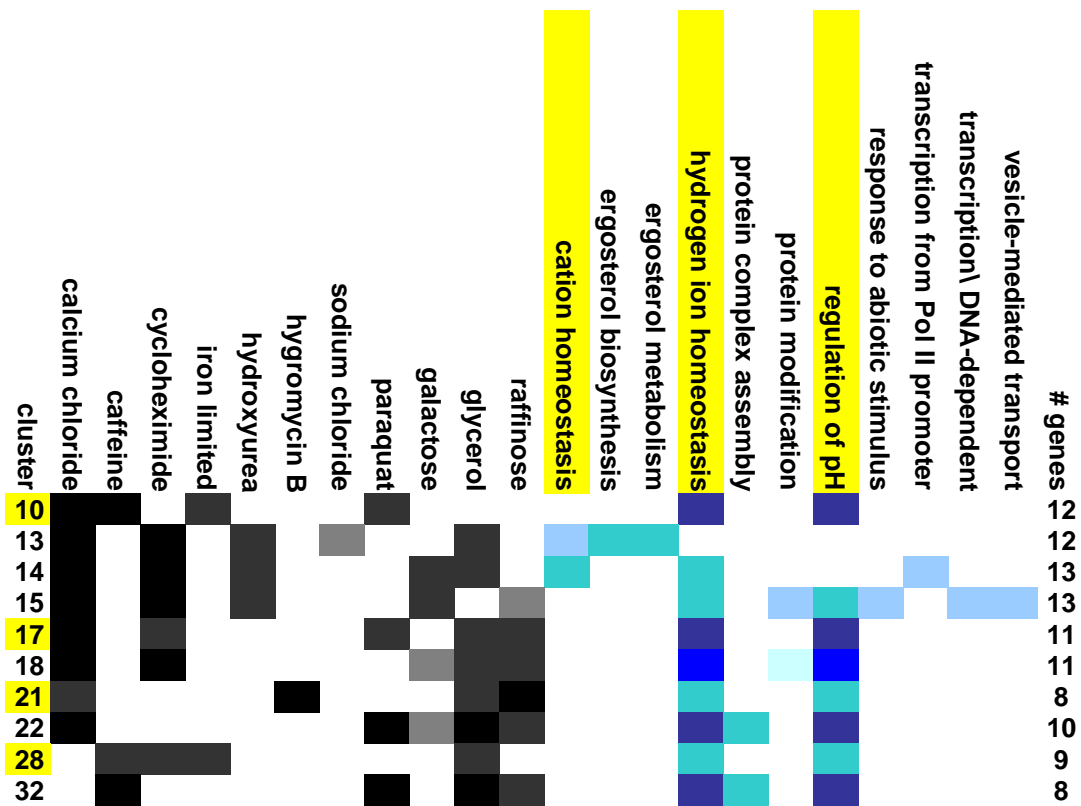

**Supplementary Figure 3.** Biclusters enriched for pH regulation. The phenotype and functional enrichment profiles of 10 clusters that show significant enrichment for GO functional categories related to pH regulation (yellow). Four of these clusters (#10, 17, 21, and 28) were enriched for these categories exclusively.
